# Supplementary material
Source: PubMed Central journal article supplement (PMC4195520)
Supplement: bm5010355_si_001.pdf [file bm5010355_si_001.pdf]

## **D-amino acids Modulate the Cellular Response of Enzymatic-Instructed Supramolecular Nanofibers of Small Peptides**

Junfeng Shi, Xuewen Du, Dan Yuan, Jie Zhou, Ning Zhou, Yibing Huang<sup>†</sup>, and Bing Xu\*

### Contents

**Fig S1.** Chemical structures

**Fig S2.** Rheological measurement

**Fig S3, S4.** TEM images

**Fig S5, S6.** Cell viability of precursors and hydrogelators

**Fig S7.** Light scattering measurement

**Fig S8.** Optical images of samples in Fig S7

**Fig S9.** CD spectra

**Fig S10.** LC-MS of condition culture medium

**Fig S11.** Optical images of pericellular hydrogel

**Fig S12.** <sup>31</sup>P- NMR of precursors

**Fig S13.** LC-MS of precursors and hydrogelators.

**a), b).** NMR spectra of precursors and hydrogelators

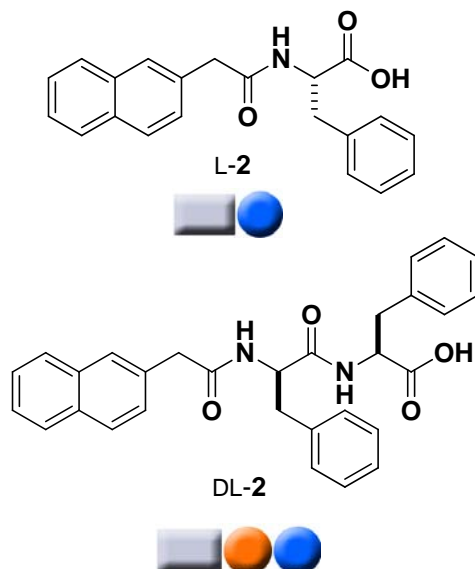

Figure S1. The chemical structure of L-2 and DL-2.

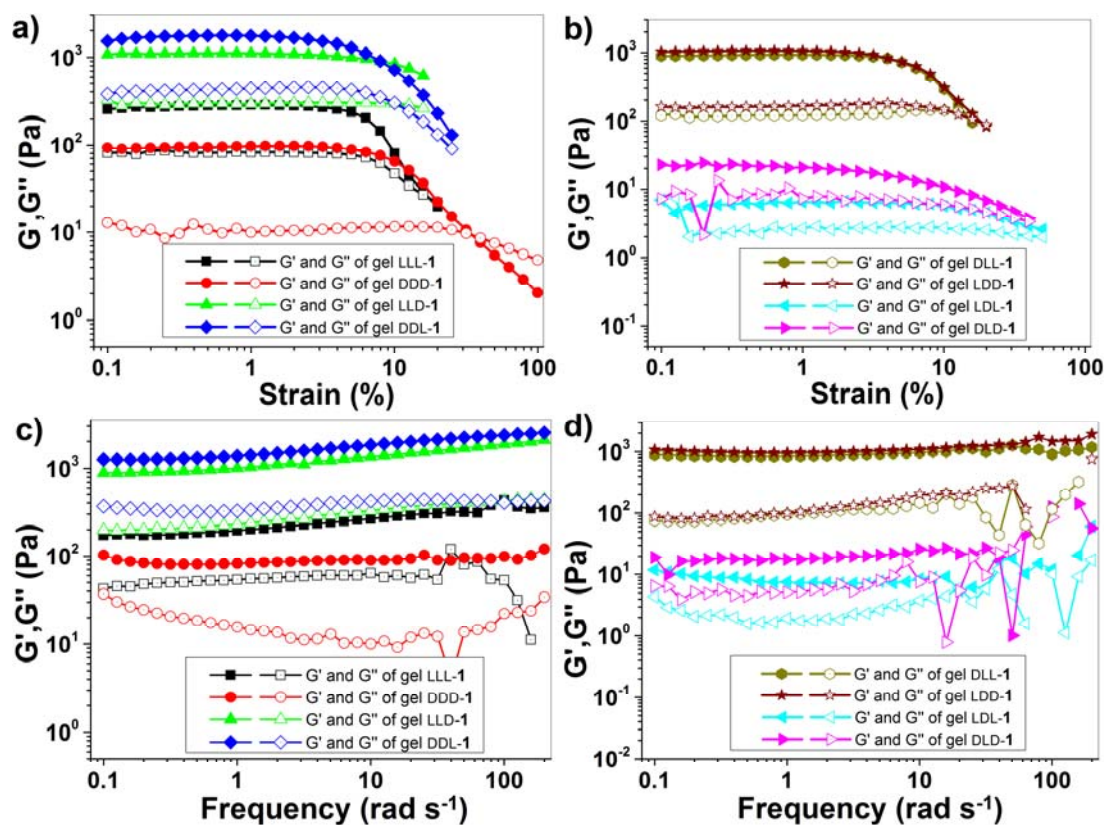

Figure S2. Rheological properties of hydrogels, Strain sweep (a,b); frequency sweep (c,d) of hydrogels prepared by adding the ALP (12.5 U/mL) to the solution of the corresponding precursors at the concentration of 0.6 wt %.

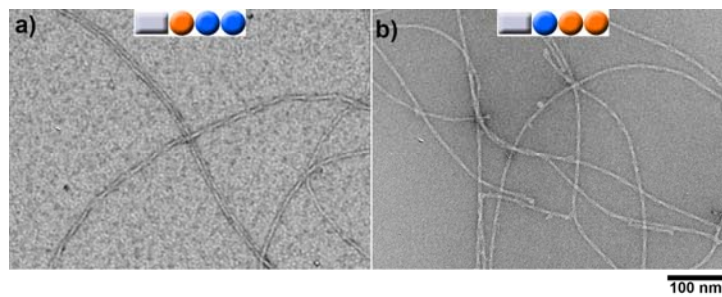

Figure S3. The TEM images of hydrogel of (A) DLL-1 and (B) LDD-1.

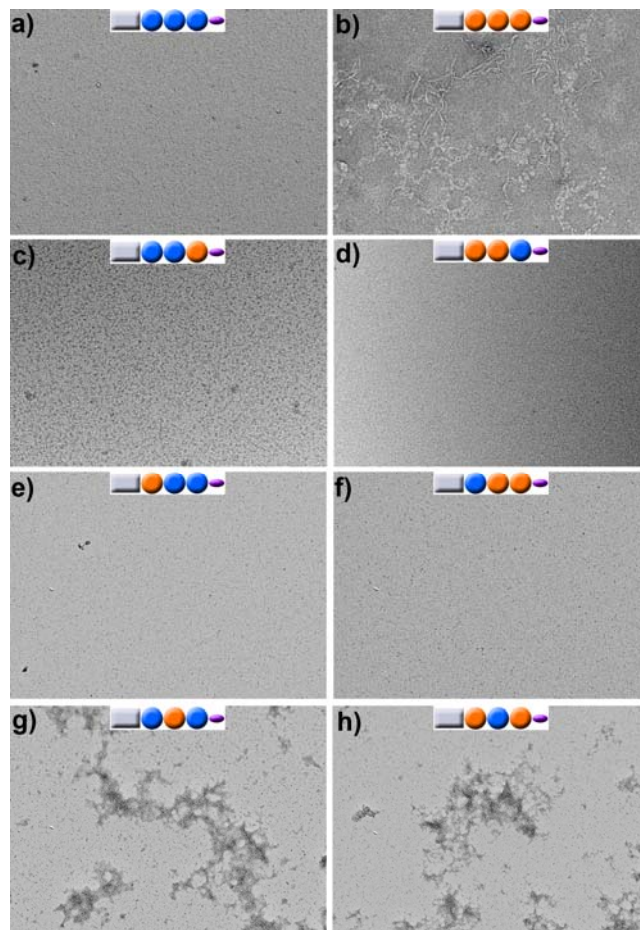

Figure S4. TEM images of precursors at the concentration of 500 μM. The compounds dissolve in the PBS buffer (pH 7.4), scale bar is 100 nm.

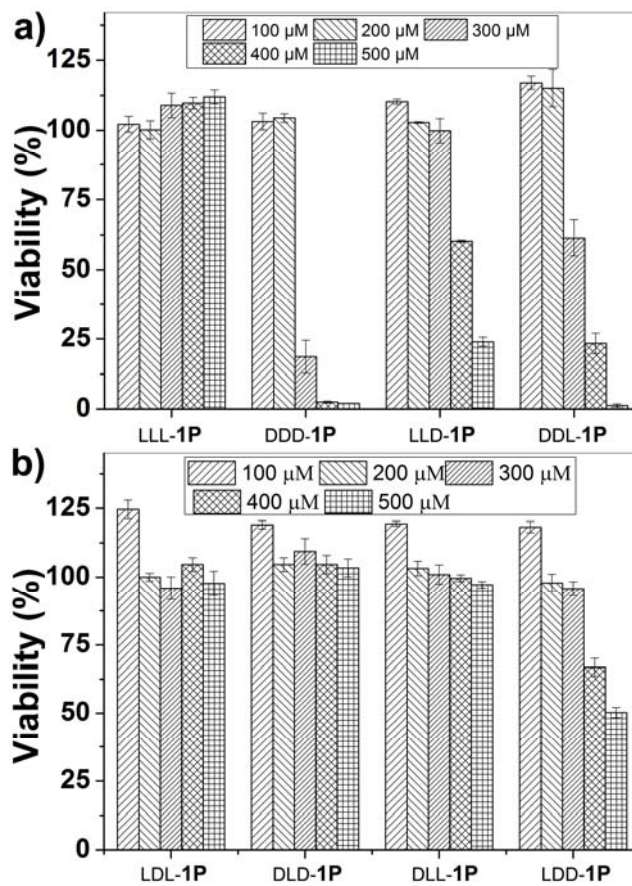

Figure S5. The viabilities of HeLa cells incubated with the precursors at concentrations from 100  $\mu\text{M}$  to 500  $\mu\text{M}$  for 48 h.

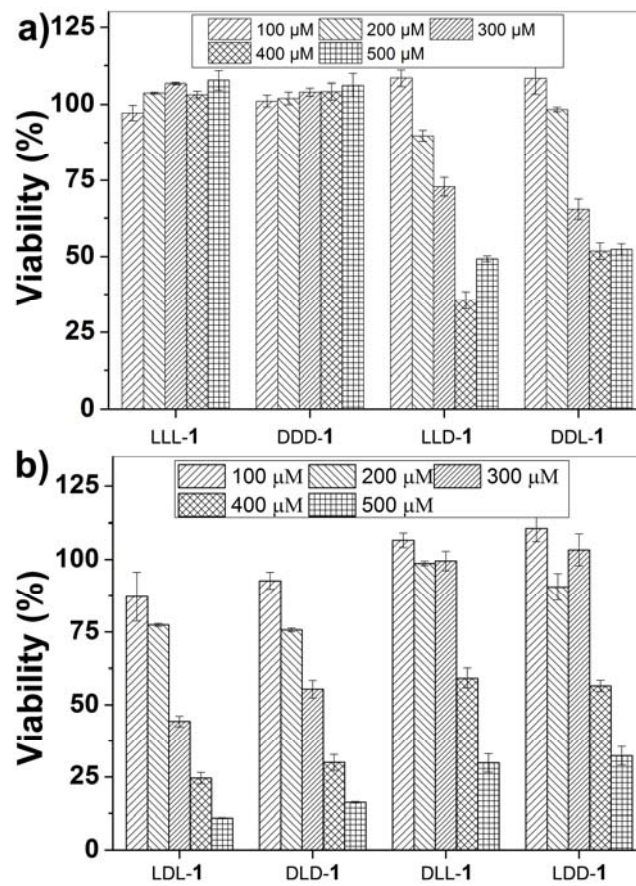

Figure S6. The viabilities of HeLa cells incubated with the hydrogelators at concentrations from 100  $\mu$ M to 500  $\mu$ M for 48 h



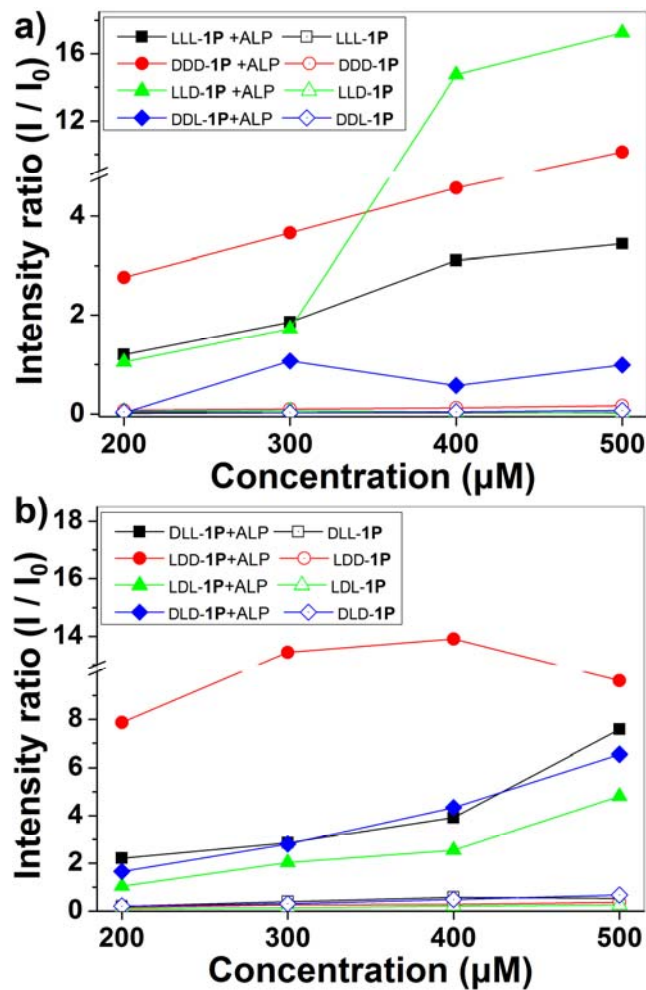

Figure S7. The intensity of static light scattering of the solution of precursors treated with (filled) and without (hollow) phosphatase (ALP) (condition: 0.5 U/mL of ALP, 24 h, room temperature). Only the light scattering signal at 30 degree was present.

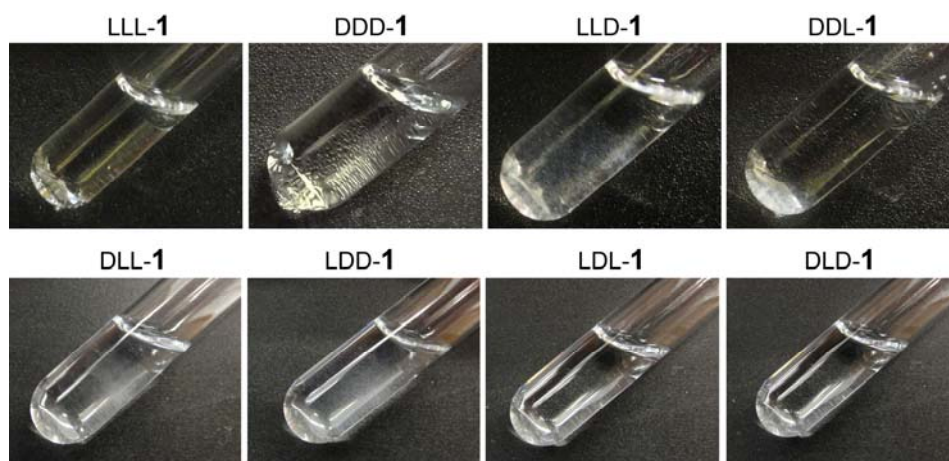

Figure S8. Optical images of the samples for light scattering Test (Condition see in Figure S7).

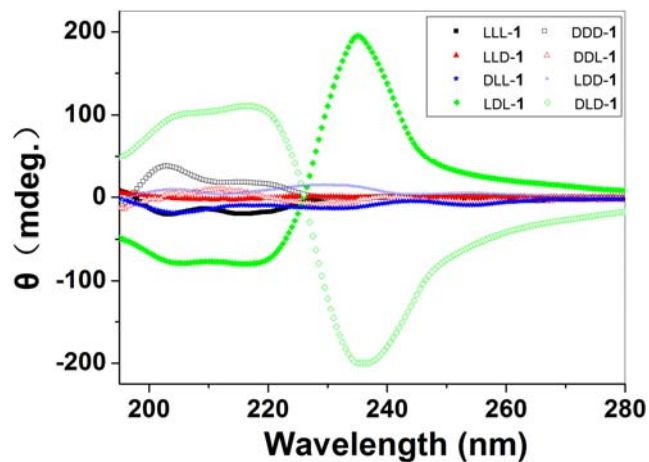

Figure S9. CD spectra of hydrogels, form upon addition of ALP to the solution of corresponding precursors at the concentration of 0.6 wt%.

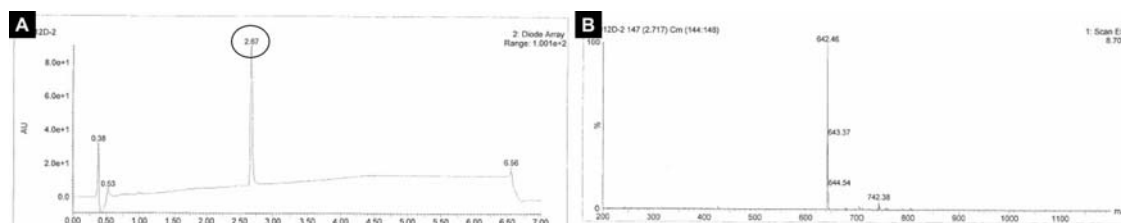

Figure S10. LC-MS result of cell culture medium of HeLa cell incubated with DDD-**1P** (300  $\mu$ M) 24 hours at 37  $^{\circ}$ C (A) LC-spectrum of cell culture medium. We found the retention time of DDD-**1** was around 2.67 min. (B) The ESI<sup>+</sup> mass spectrum of the peak marked 2.67 in (A) showed that is DDD-**1** anion (MW =643.73 Da)

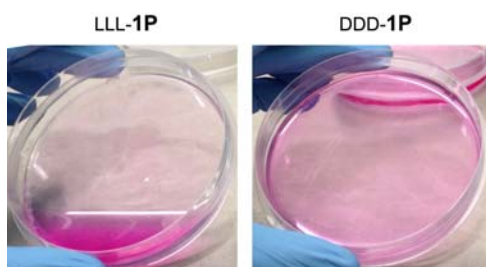

Figure S11. The optical images of HeLa cell incubated with precursors (300  $\mu$ M) for 24h at 37  $^{\circ}$ C, suggesting that DDD-**1P** could form hydrogel in pericellular space.

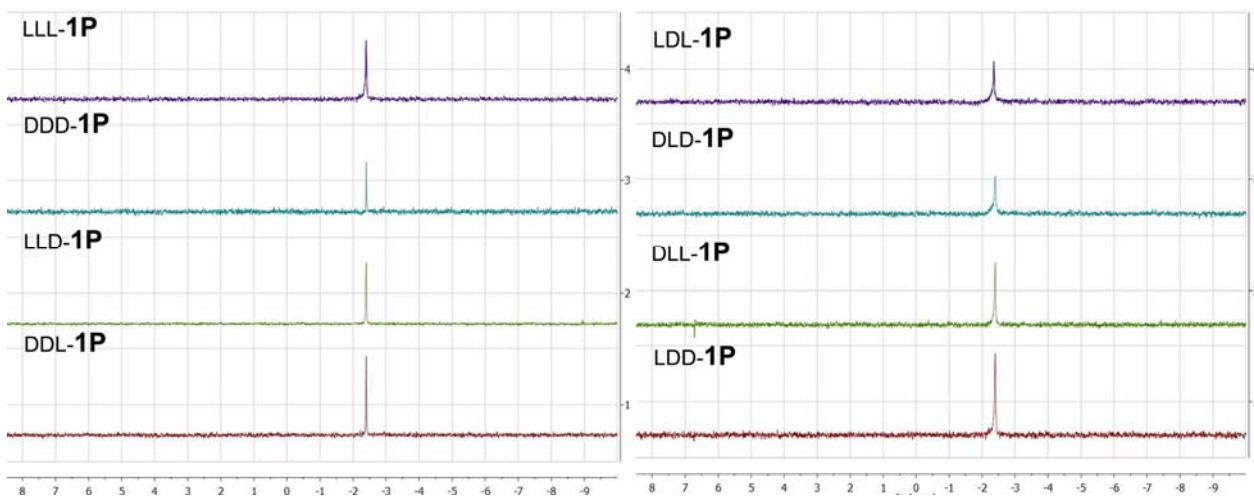

**Figure S12.** The  $^{31}\text{P}$ -NMR spectra of the precursors.

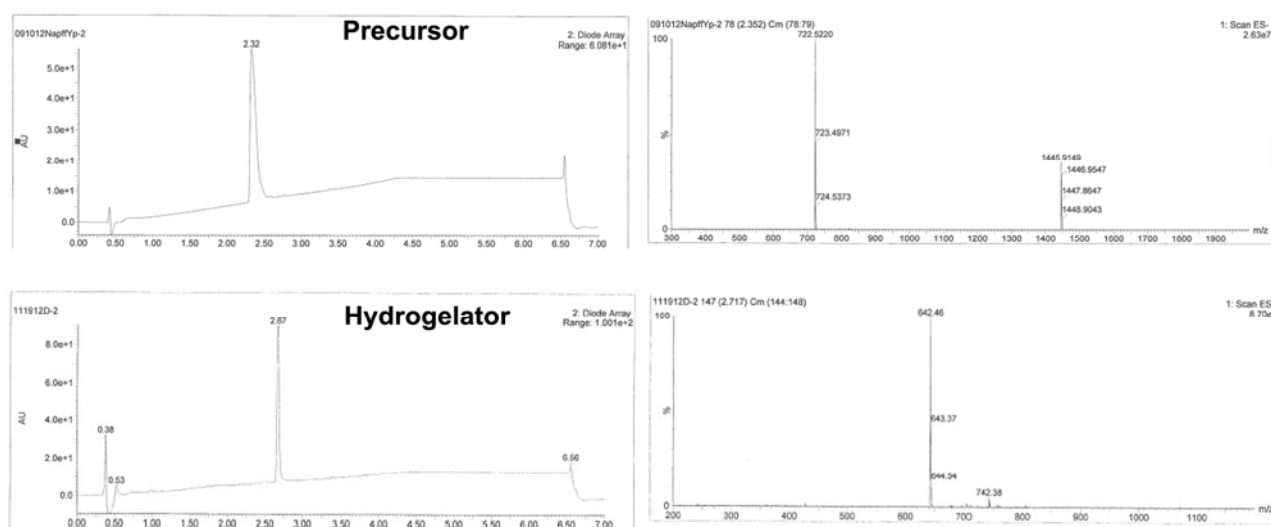

**Figure S13.** Representative LC-MS spectra of the precursor and corresponding hydrogelator

### LC-MS (ESI):

LLL-**1P** (m/z):  $\text{C}_{39}\text{H}_{38}\text{N}_3\text{O}_9\text{P}$ , calc. 723.23; observed  $(\text{M}+1)^+$  724.41,  $(\text{M}-1)^-$  722.52.

LLL-**1** (m/z):  $\text{C}_{39}\text{H}_{37}\text{N}_3\text{O}_6$ , calc. 643.27; observed  $(\text{M}+1)^+$  644.35,  $(\text{M}-1)^-$  642.46.

DDD-**1P** (m/z):  $\text{C}_{39}\text{H}_{38}\text{N}_3\text{O}_9\text{P}$ , calc. 723.23; observed  $(\text{M}+1)^+$  724.41,  $(\text{M}-1)^-$  722.52.

DDD-**1** (m/z):  $\text{C}_{39}\text{H}_{37}\text{N}_3\text{O}_6$ , calc. 643.27; observed  $(\text{M}+1)^+$  644.35,  $(\text{M}-1)^-$  642.46.

LLD-**1P** (m/z):  $\text{C}_{39}\text{H}_{38}\text{N}_3\text{O}_9\text{P}$ , calc. 723.23; observed  $(\text{M}+1)^+$  724.41,  $(\text{M}-1)^-$  722.52.

LLD-**1** (m/z):  $\text{C}_{39}\text{H}_{37}\text{N}_3\text{O}_6$ , calc. 643.27; observed  $(\text{M}+1)^+$  644.35,  $(\text{M}-1)^-$  642.46.

DDL-**1P** (m/z):  $\text{C}_{39}\text{H}_{38}\text{N}_3\text{O}_9\text{P}$ , calc. 723.23; observed  $(\text{M}+1)^+$  724.41,  $(\text{M}-1)^-$  722.52.



DDL-1 (m/z): C<sub>39</sub>H<sub>37</sub>N<sub>3</sub>O<sub>6</sub>, calc. 643.27; observed (M+1)<sup>+</sup> 644.35, (M-1)<sup>-</sup> 642.46.

LDL-1P (m/z): C<sub>39</sub>H<sub>38</sub>N<sub>3</sub>O<sub>9</sub>P, calc. 723.23; observed (M+1)<sup>+</sup> 724.41, (M-1)<sup>-</sup> 722.52.

LDL-1 (m/z): C<sub>39</sub>H<sub>37</sub>N<sub>3</sub>O<sub>6</sub>, calc. 643.27; observed (M+1)<sup>+</sup> 644.35, (M-1)<sup>-</sup> 642.46.

DLD-1P (m/z): C<sub>39</sub>H<sub>38</sub>N<sub>3</sub>O<sub>9</sub>P, calc. 723.23; observed (M+1)<sup>+</sup> 724.41, (M-1)<sup>-</sup> 722.52.

DLD-1 (m/z): C<sub>39</sub>H<sub>37</sub>N<sub>3</sub>O<sub>6</sub>, calc. 643.27; observed (M+1)<sup>+</sup> 644.35, (M-1)<sup>-</sup> 642.46.

DLL-1P (m/z): C<sub>39</sub>H<sub>38</sub>N<sub>3</sub>O<sub>9</sub>P, calc. 723.23; observed (M+1)<sup>+</sup> 724.41, (M-1)<sup>-</sup> 722.52.

DLL-1 (m/z): C<sub>39</sub>H<sub>37</sub>N<sub>3</sub>O<sub>6</sub>, calc. 643.27; observed (M+1)<sup>+</sup> 644.35, (M-1)<sup>-</sup> 642.46.

LDD-1P (m/z): C<sub>39</sub>H<sub>38</sub>N<sub>3</sub>O<sub>9</sub>P, calc. 723.23; observed (M+1)<sup>+</sup> 724.41, (M-1)<sup>-</sup> 722.52.

LDD-1 (m/z): C<sub>39</sub>H<sub>37</sub>N<sub>3</sub>O<sub>6</sub>, calc. 643.27; observed (M+1)<sup>+</sup> 644.35, (M-1)<sup>-</sup> 642.46.

a). The NMR spectra of precursors

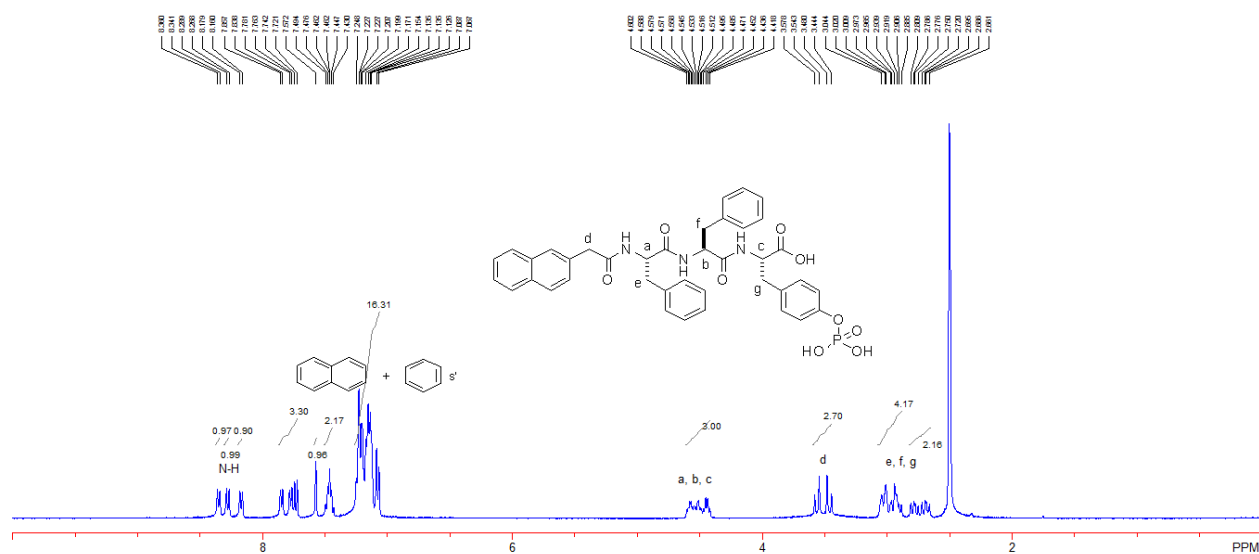

NapFFYp-LLL-1P



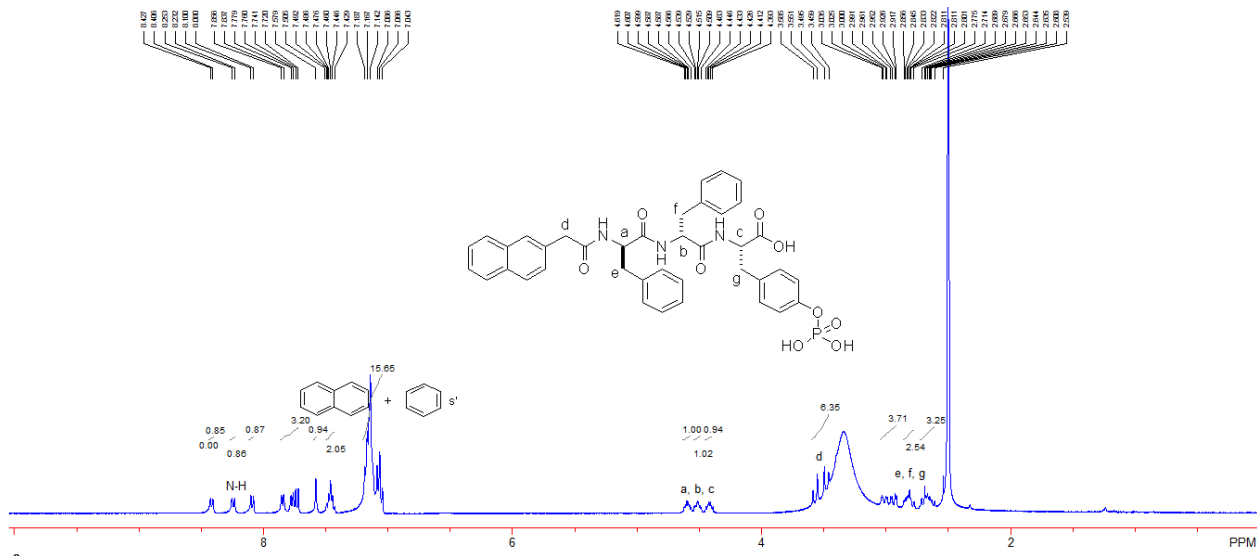

NapffYp-DDL-1P

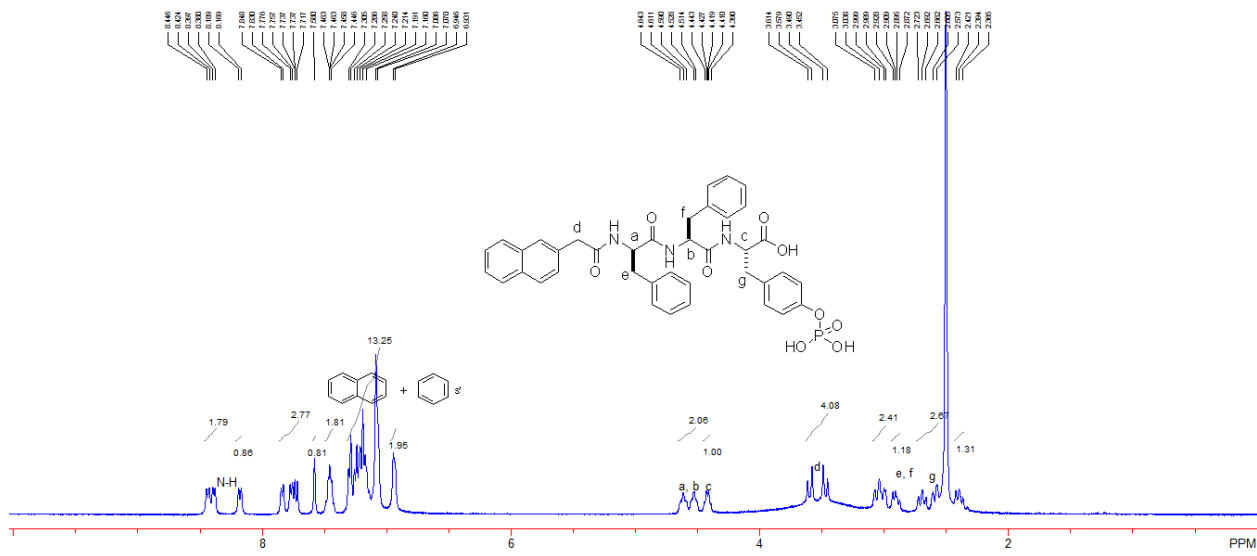

NapffYp-DLL-1P

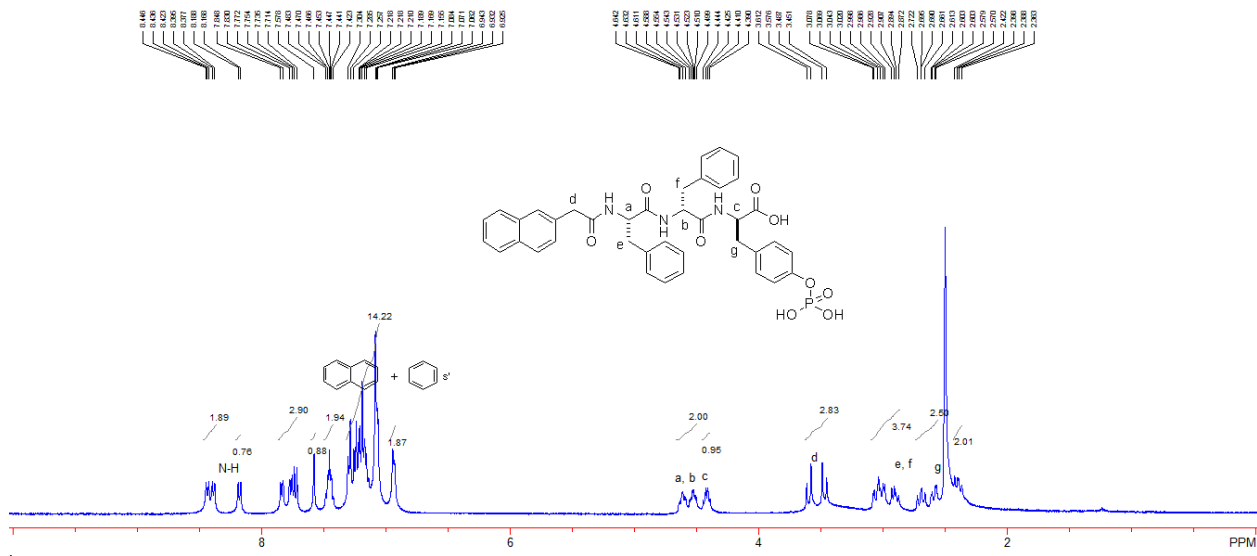

NapFfyp-LDD-1P

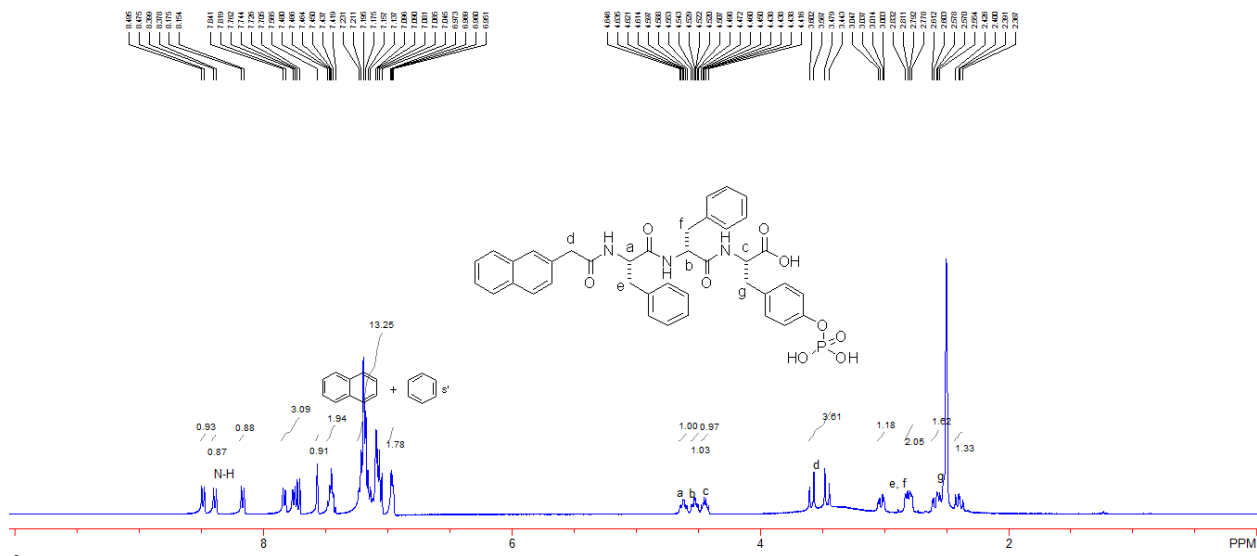

NapFfYp-LDL-1P





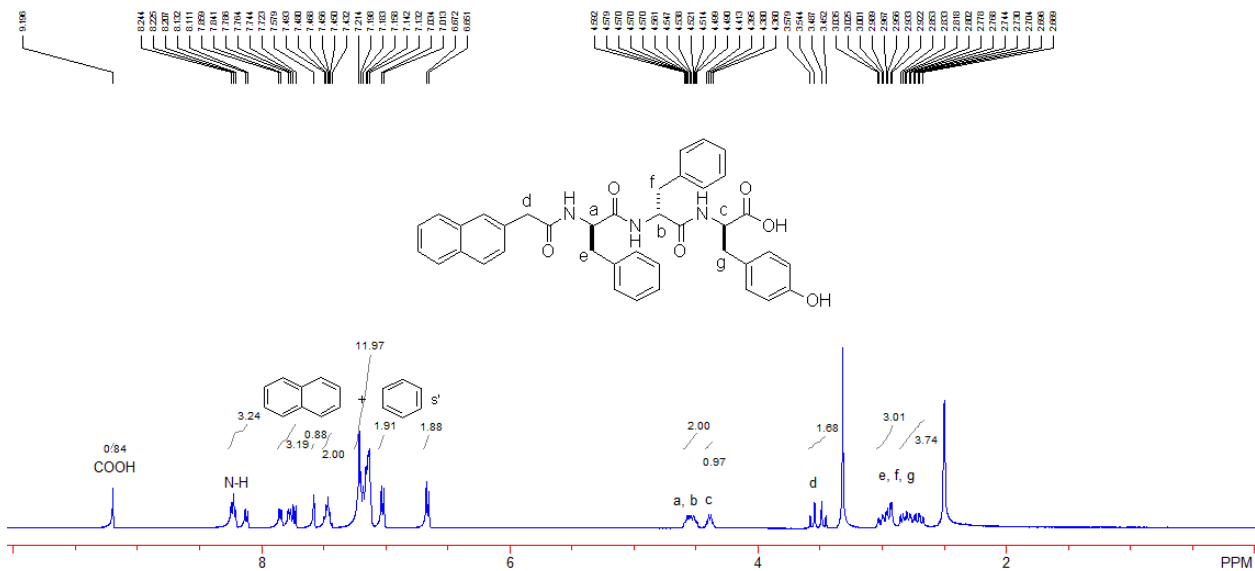

Napffy-DDD-1

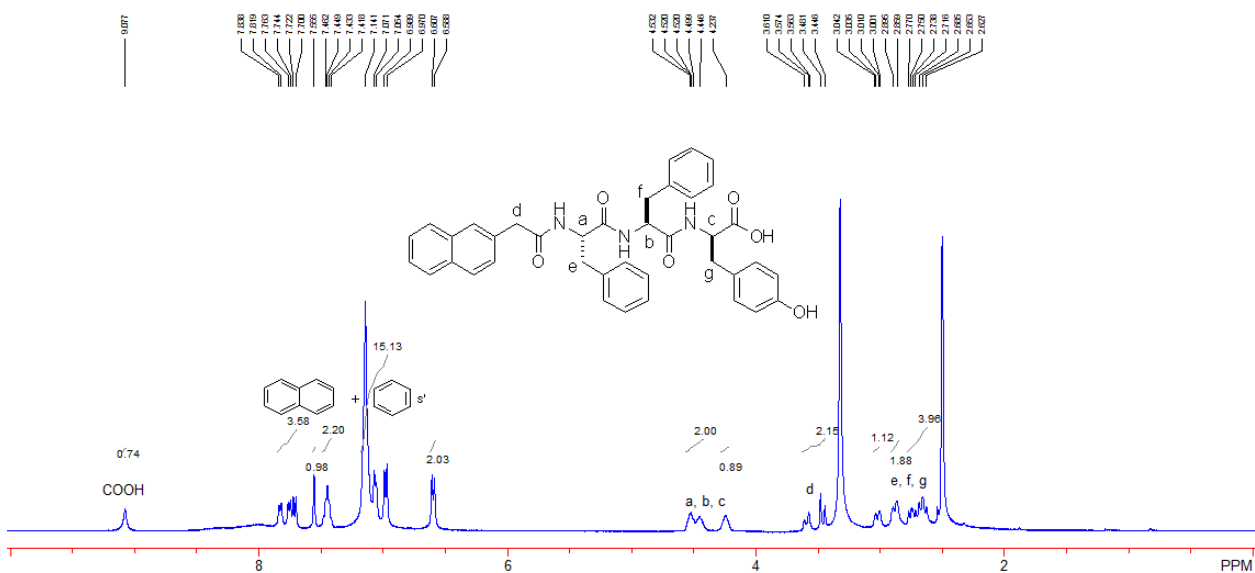

NapFFy-LLD-1

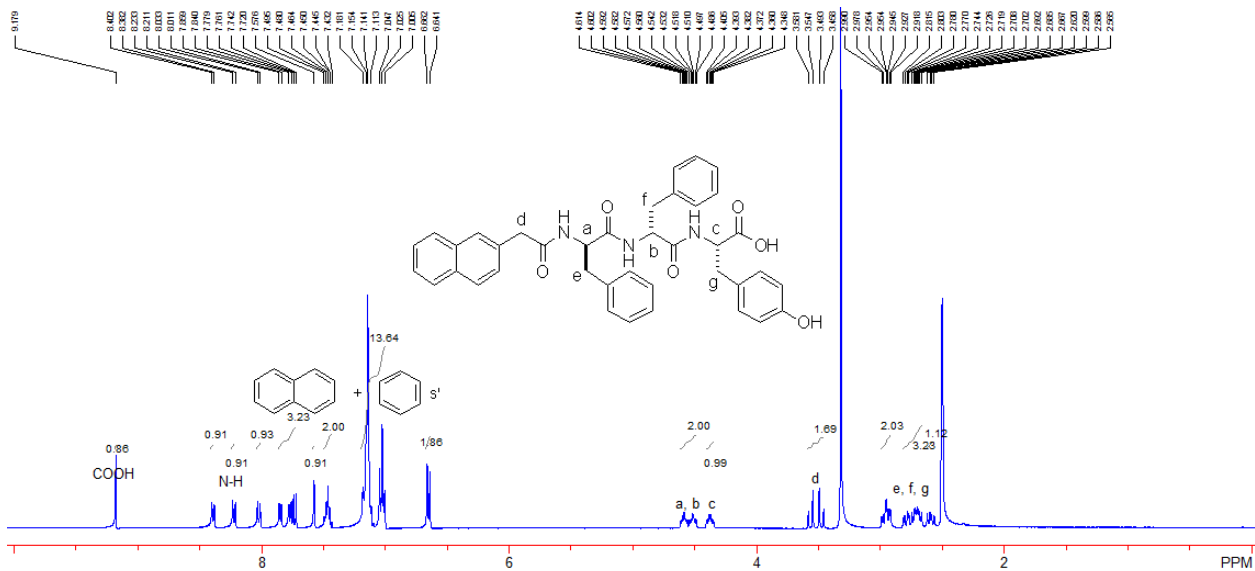

NapffY-DDL-1

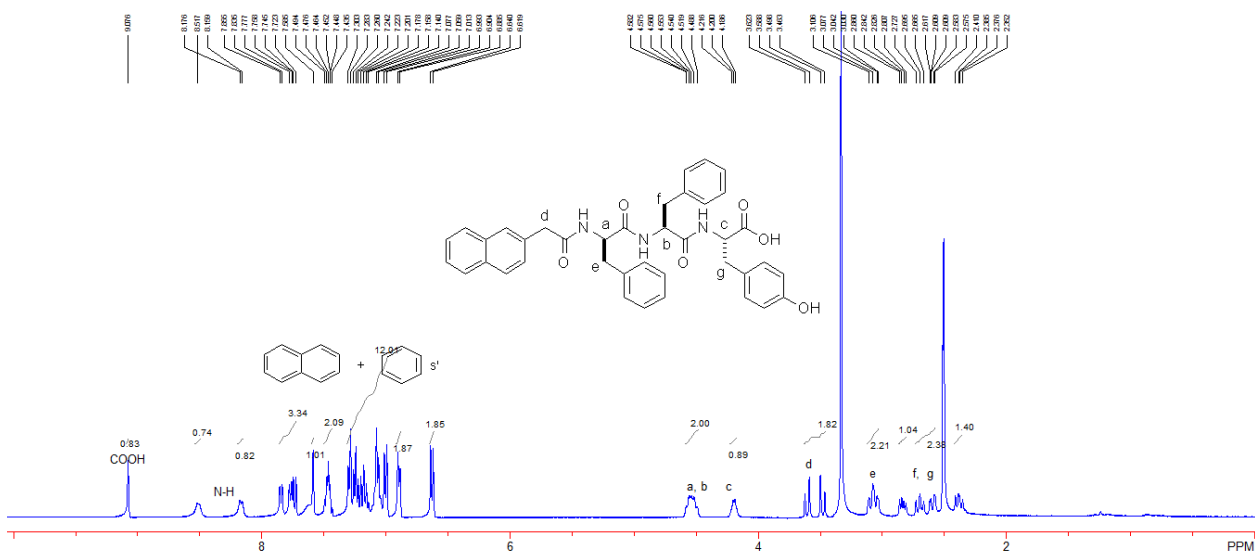

NapfFY-DLL-1

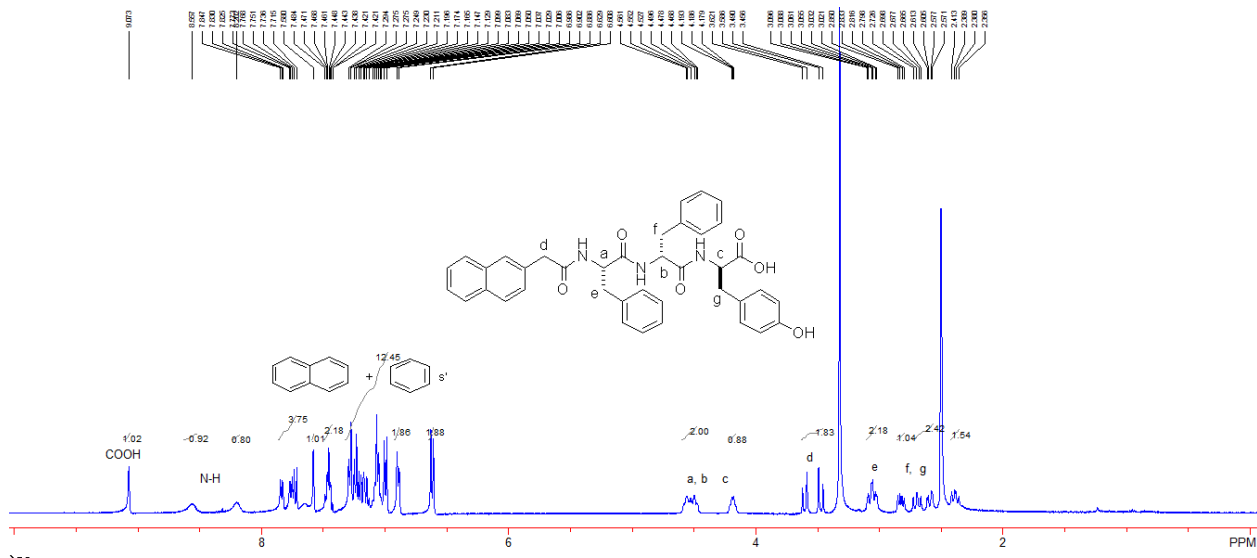

NapFfy-LDD-1

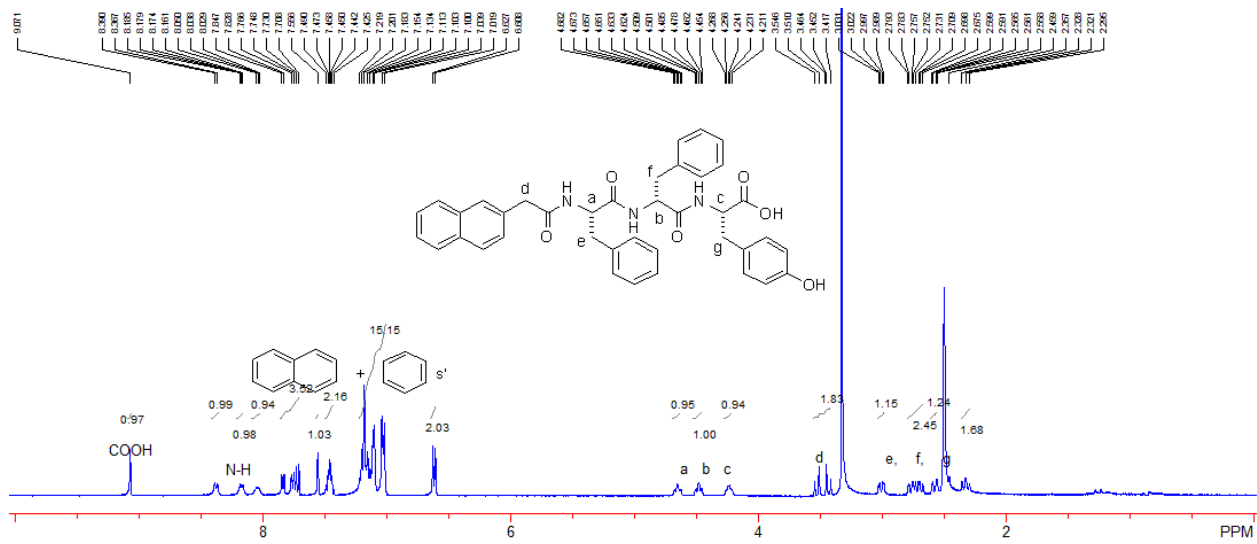

NapFfy-LDL-1
